# Supplementary material for: A year in words: The dynamics and consequences of language experiences in an intervention classroom
Source: PLOS journal article supplement (doi:10.1371/journal.pone.0199893), 2018-07-06

A

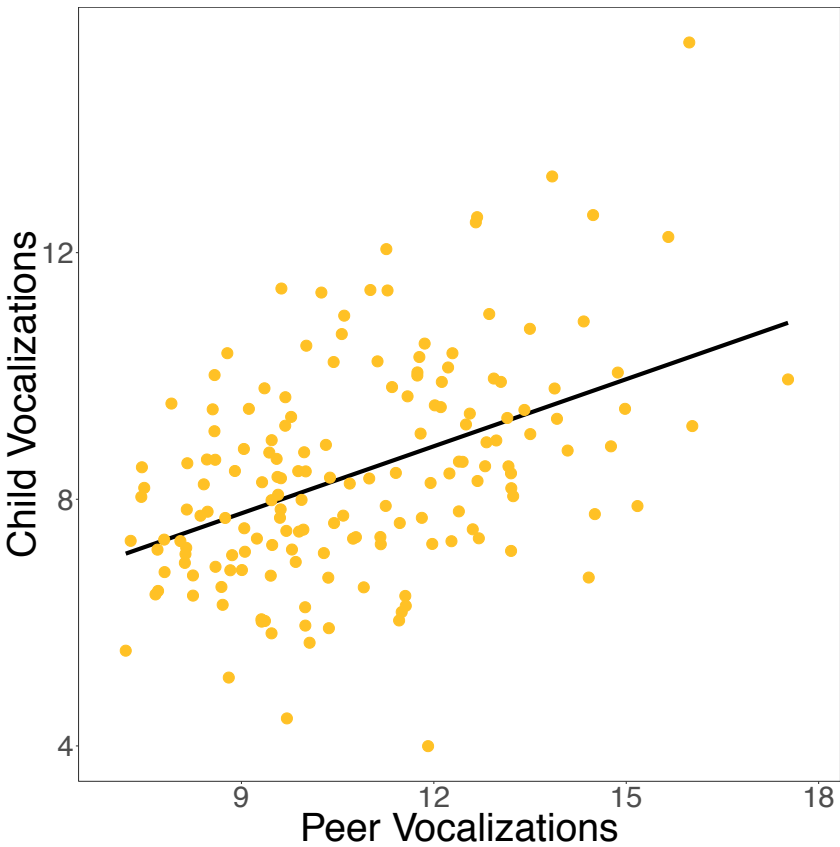

B

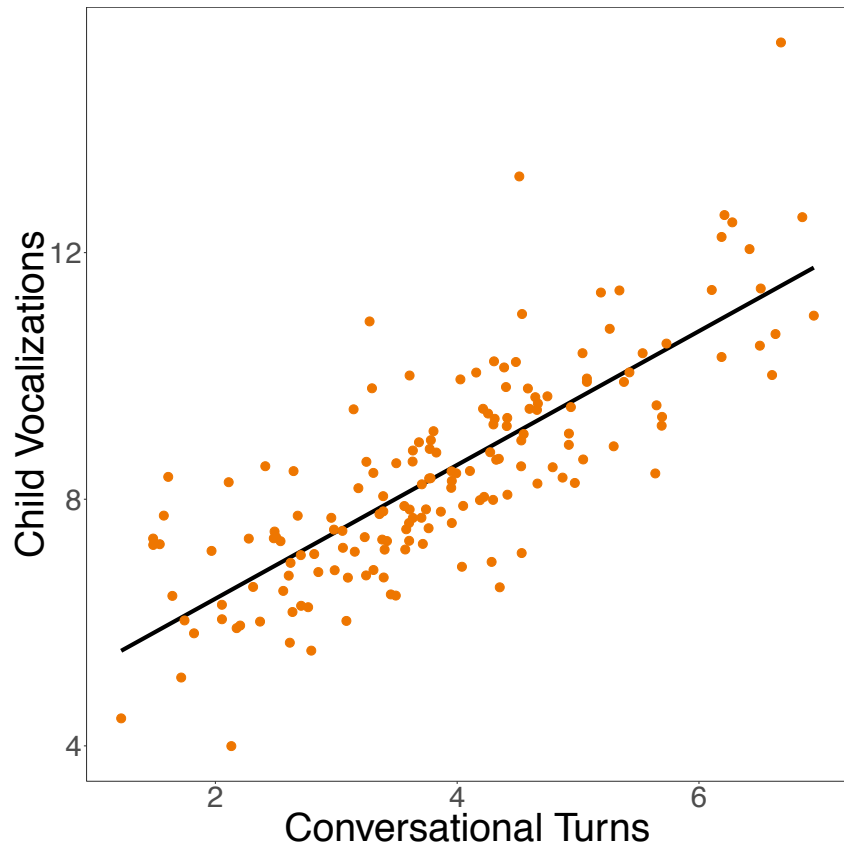

Supplement: S1 (10.1371/journal.pone.0199893.s001) [file journal.pone.0199893.s001]
